# Supplementary material
Source: HighWire-hosted journal article supplement (https://jnm.snmjournals.org/highwire/filestream/94221/field_highwire_adjunct_files/0/jnm077891_Supplemental_Figures.pdf)
Supplement: jnm077891_Supplemental_Figures.pdf [file jnm077891_Supplemental_Figures.pdf]

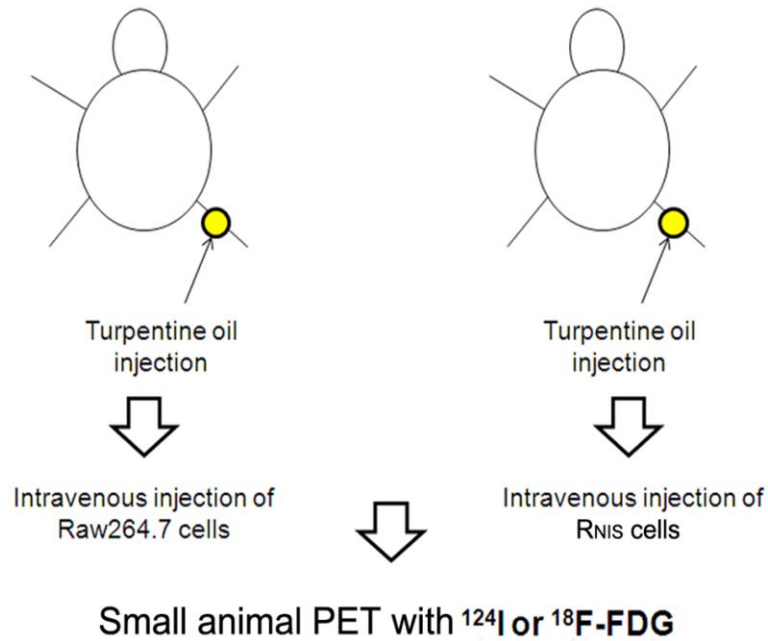

**Supplemental Figure 1.** The scheme of animal experimental schedule. Turpentine oil was intramuscularly injected into right thigh of nude mouse (5 mice per group). LPS (1  $\mu\text{g}/\text{ml}$ ) was injected to promote inflammatory process. Inflammation was confirmed 7 days later, and parental Raw264.7 cells or  $\text{R}_{\text{NIS}}$  cells ( $3 \times 10^6$  per mouse) were intravenously injected to inflammation-induced mice. MicroPET imaging with I-124 and F-18 FDG was acquired at designated time point.

**Raw264.7**

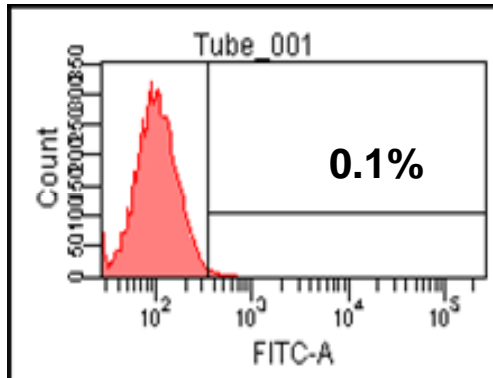

**R<sub>NIS</sub>**

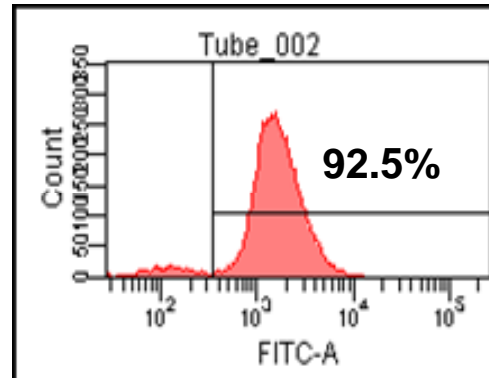

**Supplemental Figure 2.** Flow cytometry analysis to determine the expression of GFP protein.

FACS analysis to examine the GFP gene expression in macrophage Raw264.7 cell line stably expressing hNIS and GFP gene (R<sub>NIS</sub>).

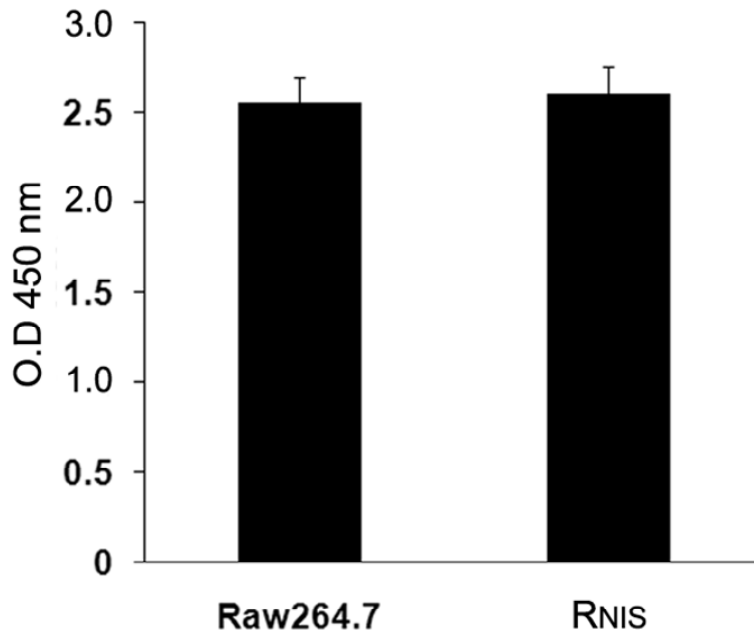

**Supplemental Figure 3.** Cell proliferation assay. Cells were plated at  $2 \times 10^4$  per well in 96-well plate and later, cell viability was assessed at 2 days with a CCK-8 assay.

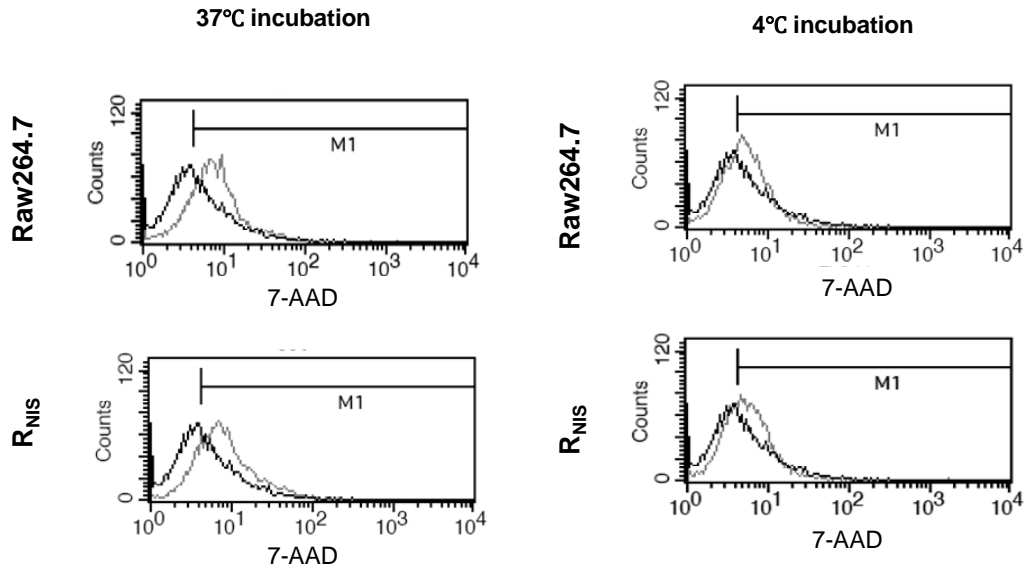

4B

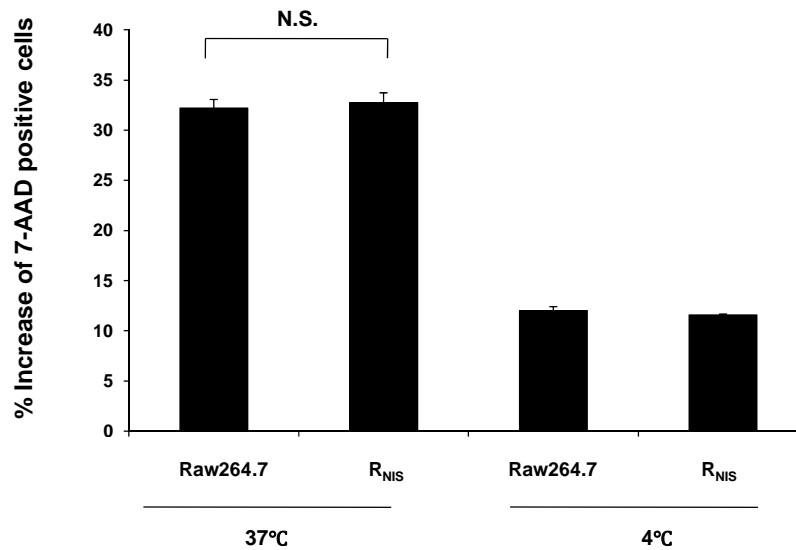

**Supplemental Figure 4.** Measurement of phagocytic activity. (A) Flow cytometric analysis for 7-AAD positive cells. (B) The Y axis indicates relative increases in percentages of 7-AAD positive cells. Black and gray line indicate non-treated control cell and 7-AAD stained cells, respectively. Ten thousand cells were analyzed and % increases depict the relative increases in percentage of 7-AAD positive macrophage cells treated with 7-AAD stained *E. coli* compared to those treated with no 7-AAD stained *E. coli*. Bars represent mean  $\pm$  SD. N.S., not significant.
